# Supplementary material for: Comparison of the Zebrafish Embryo Toxicity Assay and the General and Behavioral Embryo Toxicity Assay as New Approach Methods for Chemical Screening
Source: PubMed Central journal article supplement (PMC7767334; doi:10.3390/toxics8040126), 2020-12-21
Supplement: toxics-08-00126-s001.pdf [file toxics-08-00126-s001.pdf]

# Supplementary Material: Comparison of the Zebrafish Embryo Toxicity Assay and the General and Behavioral Embryo Toxicity Assay as New Approach Methods for Chemical Screening

John C. Achenbach <sup>1</sup>, Cindy Leggiadro <sup>1</sup>, Sandra A. Sperker <sup>1</sup>, Cindy Woodland <sup>2</sup> and Lee D. Ellis <sup>2\*</sup>

| Compound                | LOEC (µM) | total distance travelled (mm) | S.E.M. | N  | Significance |
|-------------------------|-----------|-------------------------------|--------|----|--------------|
| Permethrin              | 2         | <b>4942</b>                   | 568.9  | 71 | *            |
| Bisphenol S             | 5000      | 0                             | 0      | 48 |              |
| Benzophenone            | 5000      | 700.9                         | 271    | 13 | **           |
| Raloxifene HCl          | 3         | <b>2500</b>                   | 206.7  | 36 | ****         |
| Thiobendazole           | 90        | 1348                          | 96.86  | 35 | *            |
| TDCPP                   | 25        | 448.5                         | 95.83  | 40 | ****         |
| 3,4-Dichloroaniline     | 25        | 490.2                         | 159.6  | 21 | ***          |
| TBBPA                   | 0.05      | 1317.0                        | 155.4  | 34 | **           |
| Triphenyl phosphate     | 0.1       | <b>2235</b>                   | 184.9  | 42 | *            |
| Resorcinol              | 4000      | 657                           | 200.9  | 19 | *            |
| Testosterone propionate | 180       | 0                             | 0      | 36 |              |
| Amoxicillin             | -         | -                             | -      | -  |              |
| Valproic acid           | 250       | <b>2389</b>                   | 168.4  | 35 | **           |
| Propofol                | 200       | 0                             | 0      | 36 |              |
| Bisphenol A             | 50        | 1383                          | 158.1  | 41 | *            |
| Tricresyl phosphate     | 0.1       | <b>1751</b>                   | 217    | 36 | *            |
| Dechlorane Plus         | -         | -                             | -      | -  |              |
| Pyriproxifen            | 0.1       | 1171                          | 141.6  | 36 | **           |
| Pyrene                  | 50        | 522.5                         | 117.9  | 36 | ***          |
| Aldicarb                | 1         | 790.4                         | 111.8  | 36 | **           |

**Table S1.** Calculated behavioural lowest effected concentration (LOEC) values. The mean total distance travelled in 30 min under lighted conditions for living larvae at each exposure concentration was compared to vehicle controls using a one-way ANOVA followed by a Dunnett's multiple comparisons test with single pooled variance. For each LOEC the standard error of the mean (S.E.M.) value is indicated along with the number of embryos (n) and the statistical significance from vehicle control (\*  $p < 0.0332$ , \*\*  $p < 0.0021$ , \*\*\*  $p < 0.0002$ , \*\*\*\*  $p < 0.0001$ ). Distance travelled values larger than their corresponding vehicle controls are indicated in boldface. Hyphens (-) denote that a LOEC could not be calculated as there was no statistical significance observed between any exposure concentration and the vehicle control.
